# Supplementary material
Source: publisher figshare collection journal article supplement (https://diabetesjournals.figshare.com/articles/dataset/_/21719837)
Supplement: Supplementary file 2 [file 2]

## SUPPLEMENTAL MATERIAL

**Supplemental Table S1.** Distribution of 3,168 samples with genomic data by self-reported race/ethnicity and DPP treatment arm that underwent imputation.

| Self-reported race/ethnicity | Treatment arm |     |     |      | Total |
|------------------------------|---------------|-----|-----|------|-------|
|                              | MET           | ILS | PBO | TROG |       |
| AfrAm                        | 178           | 173 | 186 | 94   | 631   |
| AsnPI                        | 31            | 49  | 38  | 20   | 138   |
| Hisp                         | 143           | 161 | 147 | 89   | 540   |
| AI                           | 21            | 28  | 27  | 3    | 79    |
| White                        | 507           | 479 | 490 | 304  | 1780  |
| <b>Total</b>                 | 880           | 890 | 888 | 510  | 3168  |

AfrAm=African American; AsnPI=Asian/Pacific Islander; Hisp=Hispanic/Latino; AI=American Indian; MET=metformin; ILS=intensive lifestyle modification; PBO=placebo; TROG=troglitazone

### Descriptions of replication cohorts:

The Metformin Genetics (MetGen) Consortium: MetGen consists of 20 research institutions from Europe and the United States with available data for studies of metformin pharmacogenetics from population observational studies and clinical trials. This resource has an excess of 10,000 multi-ethnic individuals with established type 2 diabetes (T2D) across over 12 cohorts in whom a pharmacogenetic meta-analysis of metformin has been performed using a harmonized measure of glycemic response. Additional details regarding the methodology of the meta-GWAS can be found in Zhou *et al.* (1).

The Million Veteran Program (MVP): The MVP is a mega-biobank in the Department of Veteran Affairs (VA) healthcare system that combines survey data, clinical electronic health record information, and biospecimens to enable genomic research. Recently, 318 novel genetic risk loci for T2D were identified in a multi-ethnic analysis that incorporated over 100,000 cases of T2D from MVP (2). For this replication analysis, we included 2733 individuals who self-identified as non-Hispanic African Americans with a baseline HbA1c  $\geq 6.5\%$  and received metformin monotherapy for up to 15 months.

Diabetes Multi-omic Investigation of Drug Response (DIAMOND): DIAMOND is an NIH-funded study that aimed to enroll 5500 individuals with T2D from the metropolitan Detroit and the surrounding areas of southeast Michigan for the purposes of understanding the genetic causes of diabetes, diabetes-related traits, and medication response. Individuals with more than two diabetes diagnoses and at least two historical HbA1c tests drawn over 4 months apart were identified from the electronic medical record in the Henry Ford Health System. For this replication analysis, we assessed a subset of 471 individuals who self-reported as African American and had an average daily exposure of  $\geq 500$  mg metformin in the 120 days prior to the follow-up HbA1c measurement. The follow-up period was between 4-18 months.

**Supplemental Table S2.** Genotyping platforms and models utilized in each replication analysis.

| <b>Cohort</b> | <b>Genotyping and Imputation</b>                                                                                                          | <b>Outcome</b>                                              | <b>Covariates</b>                                                                                                                                                                                                                                                                     |
|---------------|-------------------------------------------------------------------------------------------------------------------------------------------|-------------------------------------------------------------|---------------------------------------------------------------------------------------------------------------------------------------------------------------------------------------------------------------------------------------------------------------------------------------|
| MetGen        | See Supplementary Table 2 of Zhou <i>et al.</i> (1) for details of the genotyping platforms and imputation methods used for the meta-GWAS | Change in HbA1c (baseline minus follow-up within 18 months) | Baseline HbA1c, adherence, metformin dose, treatment group (metformin monotherapy vs. add-on to sulfonylurea), 10 ancestry PCs<br><br>Some covariates were included to varying degrees – see Supplementary Table 2 of Zhou <i>et al.</i> (1) for details of the study-specific models |
| MVP           | Custom Affymetrix Axiom array (MVP 1.0)<br><br>Imputation using 1000 Genomes Project Phase 3 reference panel                              | Change in HbA1c (baseline minus follow-up within 15 months) | Baseline HbA1c, age, BMI, metformin dose, number of HbA1c measurements, 10 ancestry PCs                                                                                                                                                                                               |
| DIAMOND       | Axiom Precision Medicine Diversity Array<br><br>Imputation using the TOPMed reference panel (version R2 on GRC38)                         | Change in HbA1c (follow-up minus baseline within 18 months) | Baseline HbA1c, age, sex, 10 ancestry PCs                                                                                                                                                                                                                                             |

PC=principal components

**Supplemental Table S3.** Event rate for diabetes incidence by DPP treatment arm and self-reported race/ethnicity information.

|                                     | <b>MET</b> |                     | <b>PBO</b> |                     |
|-------------------------------------|------------|---------------------|------------|---------------------|
| <b>Self-reported race/ethnicity</b> | <b>N</b>   | <b># Events (%)</b> | <b>N</b>   | <b># Events (%)</b> |
| AfrAm                               | 178        | 36 (20.2)           | 186        | 61 (32.8)           |
| AsnPI                               | 31         | 8 (25.8)            | 38         | 12 (32.4)           |
| Hisp                                | 143        | 34 (23.8)           | 147        | 39 (26.5)           |
| AI                                  | 21         | 4 (20.0)            | 27         | 8 (29.6)            |
| White                               | 507        | 101 (25.1)          | 490        | 133 (27.1)          |
| <b>Total</b>                        | <b>880</b> | <b>183 (20.9)</b>   | <b>888</b> | <b>253 (28.5)</b>   |

AfrAm=African American; AsnPI=Asian/Pacific Islander; Hisp=Hispanic/Latino; AI=American Indian; MET=metformin; PBO=placebo.

**Supplemental Table S4.** Sample sizes for each individual model and outcome tested.

| <b>Outcome</b>            | <b>MET*</b><br><b>(n=880)</b> | <b>PBO*</b><br><b>(n=888)</b> | <b>G×T*</b><br><b>(n=1768)</b> |
|---------------------------|-------------------------------|-------------------------------|--------------------------------|
| Diabetes incidence        | 876                           | 887                           | 1763                           |
| HbA1c                     | 818                           | 803                           | 1621                           |
| Weight                    | 829                           | 844                           | 1673                           |
| Fasting glucose           | 821                           | 812                           | 1633                           |
| 2-hr glucose              | 817                           | 810                           | 1627                           |
| Insulin sensitivity index | 808                           | 818                           | 1626                           |
| Fasting insulin           | 802                           | 792                           | 1594                           |

MET=metformin; PBO=placebo; G×T=gene by treatment. \*The decrease in sample size from the counts in the column headings is due to data missingness within in each model (i.e., follow-up measurement for the quantitative trait was unavailable, so the value for one-year change could not be calculated).

**Supplemental Table S5.** Effect size and *p*-values, stratified by self-reported race/ethnicity, for the 14 independent genome-wide significant findings for one-year change in quantitative traits in the DPP.

| rsid                        | Chr | Position* | Nearest gene        | EA | NEA   | Trait                   | EAF <sup>†</sup> | Self-reported race/ethnicity | N   | Beta   | SE    | <i>p</i> |
|-----------------------------|-----|-----------|---------------------|----|-------|-------------------------|------------------|------------------------------|-----|--------|-------|----------|
| <b>Metformin only model</b> |     |           |                     |    |       |                         |                  |                              |     |        |       |          |
| rs144322333                 | 18  | 705550    | <i>ENOSF1</i>       | C  | CTGTT | HbA1c, %                | 0.013            | All                          | 818 | 0.39   | 0.06  | 2.9E-12  |
|                             |     |           |                     |    |       |                         | 0.065            | AfrAm                        | 166 | 0.32   | 0.06  | 1.3E-06  |
|                             |     |           |                     |    |       |                         | 0.009            | Hisp                         | 138 | 1.05   | 0.22  | 3.8E-06  |
| rs145591055                 | 5   | 38849463  | <i>OSMR</i>         | G  | A     | Weight, kg              | 0.014            | All                          | 829 | -7.55  | 1.19  | 3.2E-10  |
|                             |     |           |                     |    |       |                         | 0.018            | AsnPI                        | 28  | 6.18   | 18.75 | 7.5E-01  |
|                             |     |           |                     |    |       |                         | 0.064            | Hisp                         | 139 | -5.56  | 1.60  | 6.8E-04  |
|                             |     |           |                     |    |       |                         | 0.103            | AI                           | 21  | -3.20  | 2.79  | 2.9E-01  |
|                             |     |           |                     |    |       |                         | 0.007            | White                        | 473 | -10.71 | 3.02  | 4.4E-04  |
| rs13401282                  | 2   | 207810690 | <i>CPO</i>          | A  | T     | ISI, ln                 | 0.029            | All                          | 808 | 0.44   | 0.08  | 1.7E-08  |
|                             |     |           |                     |    |       |                         | 0.119            | AfrAm                        | 167 | 0.42   | 0.08  | 2.2E-07  |
|                             |     |           |                     |    |       |                         | 0.015            | Hisp                         | 134 | -0.25  | 0.36  | 4.9E-01  |
| rs186681623                 | 13  | 81546608  | <i>LINC00377</i>    | C  | T     | Weight, kg              | 0.068            | All                          | 829 | -2.66  | 0.47  | 2.0E-08  |
|                             |     |           |                     |    |       |                         | 0.121            | AfrAm                        | 169 | -1.98  | 0.61  | 1.5E-03  |
|                             |     |           |                     |    |       |                         | 0.074            | AsnPI                        | 28  | -7.65  | 3.11  | 2.9E-02  |
|                             |     |           |                     |    |       |                         | 0.122            | Hisp                         | 139 | -3.19  | 1.13  | 5.4E-03  |
|                             |     |           |                     |    |       |                         | 0.161            | AI                           | 21  | -5.24  | 2.68  | 9.8E-02  |
| rs17083791                  | 5   | 93863813  | <i>KIAA0825</i>     | G  | A     | Weight, kg              | 0.036            | White                        | 473 | -3.83  | 0.87  | 1.4E-05  |
|                             |     |           |                     |    |       |                         | 0.149            | All                          | 829 | -1.85  | 0.33  | 3.3E-08  |
|                             |     |           |                     |    |       |                         | 0.052            | AfrAm                        | 169 | -1.65  | 0.95  | 8.3E-02  |
|                             |     |           |                     |    |       |                         | 0.194            | AsnPI                        | 28  | 0.42   | 1.53  | 7.9E-01  |
|                             |     |           |                     |    |       |                         | 0.210            | Hisp                         | 139 | -2.08  | 0.83  | 1.3E-02  |
| rs9931871                   | 16  | 19928315  | <i>GPRC5B</i>       | G  | A     | Fasting glucose, mmol/L | 0.367            | AI                           | 21  | -3.19  | 2.39  | 2.3E-01  |
|                             |     |           |                     |    |       |                         | 0.137            | White                        | 473 | -1.71  | 0.44  | 1.2E-04  |
|                             |     |           |                     |    |       |                         | 0.011            | All                          | 821 | 0.68   | 0.12  | 3.5E-08  |
|                             |     |           |                     |    |       |                         | 0.049            | AfrAm                        | 168 | 0.62   | 0.13  | 5.9E-06  |
|                             |     |           |                     |    |       |                         | 0.012            | All                          | 818 | 0.35   | 0.06  | 3.9E-08  |
| rs549305231                 | 6   | 19497504  | <i>LOC101928519</i> | A  | G     | HbA1c, %                | 0.046            | AfrAm                        | 166 | 0.40   | 0.07  | 4.9E-08  |
|                             |     |           |                     |    |       |                         | 0.005            | Hisp                         | 138 | -1.22  | 1.24  | 3.3E-01  |
|                             |     |           |                     |    |       |                         | 0.020            | All                          | 802 | -0.47  | 0.08  | 4.1E-08  |
| rs73944532                  | 2   | 104691634 | <i>LOC100287010</i> | A  | G     | Fasting insulin, ln     | 0.075            | AfrAm                        | 165 | -0.50  | 0.09  | 1.4E-07  |
|                             |     |           |                     |    |       |                         | 0.007            | Hisp                         | 134 | -0.13  | 0.30  | 6.6E-01  |

| rsid                           | Chr | Position* | Nearest gene     | EA | NEA | Trait                   | EAF†  | Self-reported race/ethnicity | N    | Beta  | SE   | p       |
|--------------------------------|-----|-----------|------------------|----|-----|-------------------------|-------|------------------------------|------|-------|------|---------|
| <b>Gene × Treatment model‡</b> |     |           |                  |    |     |                         |       |                              |      |       |      |         |
| rs6838493                      | 4   | 185879789 | <i>LINC01093</i> | A  | T   | HbA1c, %                | 0.011 | All                          | 1621 | -0.66 | 0.11 | 1.6E-09 |
|                                |     |           |                  |    |     |                         | 0.041 | AfrAm                        | 330  | -0.80 | 0.14 | 6.0E-08 |
| rs148219263                    | 18  | 58808522  | <i>CDH20</i>     | C  | T   | Weight, kg              | 0.012 | All                          | 1673 | -6.92 | 1.22 | 1.9E-08 |
|                                |     |           |                  |    |     |                         | 0.007 | AfrAm                        | 342  | -4.09 | 6.50 | 5.3E-01 |
|                                |     |           |                  |    |     |                         | 0.011 | Hisp                         | 275  | -0.37 | 2.98 | 9.0E-01 |
|                                |     |           |                  |    |     |                         | 0.017 | White                        | 947  | -8.81 | 1.50 | 5.6E-09 |
| rs75147163                     | 14  | 57626769  | <i>EXOC5</i>     | A  | G   | Fasting glucose, mmol/L | 0.022 | All                          | 1633 | -0.73 | 0.13 | 1.4E-08 |
|                                |     |           |                  |    |     |                         | 0.053 | AfrAm                        | 334  | -1.05 | 0.25 | 4.2E-05 |
|                                |     |           |                  |    |     |                         | 0.022 | Hisp                         | 267  | -0.36 | 0.39 | 3.6E-01 |
|                                |     |           |                  |    |     |                         | 0.015 | White                        | 925  | -0.53 | 0.18 | 3.0E-03 |
| rs78075715                     | 4   | 6613716   | <i>MAN2B2</i>    | C  | T   | HbA1c, %                | 0.013 | All                          | 1621 | -0.51 | 0.09 | 1.4E-08 |
|                                |     |           |                  |    |     |                         | 0.063 | AfrAm                        | 330  | -0.53 | 0.11 | 1.4E-06 |
| rs12314996                     | 12  | 24567467  | <i>SOX5</i>      | A  | G   | HbA1c, %                | 0.016 | All                          | 1621 | -0.47 | 0.08 | 3.9E-08 |
|                                |     |           |                  |    |     |                         | 0.062 | AfrAm                        | 330  | -0.51 | 0.11 | 4.5E-06 |
|                                |     |           |                  |    |     |                         | 0.007 | Hisp                         | 266  | -0.24 | 0.60 | 6.9E-01 |
| rs143203347                    | 7   | 107384199 | <i>CBLL1</i>     | C  | G   | Fasting glucose, mmol/L | 0.015 | All                          | 1633 | -0.92 | 0.17 | 4.1E-08 |
|                                |     |           |                  |    |     |                         | 0.062 | AfrAm                        | 334  | -0.92 | 0.21 | 1.6E-05 |
|                                |     |           |                  |    |     |                         | 0.011 | Hisp                         | 267  | -0.42 | 0.62 | 5.0E-01 |

EA=Effect allele; NEA=Non-effect allele; EAF=effect allele frequency. AfrAm=African American; AsnPI=Asian/Pacific Islander; Hisp=Hispanic/Latino; AI=American Indian; ISI=insulin sensitivity index. \*GRCh37 assembly. †This is the effect allele frequency taken from Table 2. For each variant, we only included stratified analyses when the effect allele frequency was greater than 0.005 in the self-reported race/ethnicity group. ‡Beta estimates and standard errors (SE) are reported for the interaction term rather than the main effect of metformin.

**Supplemental Table S6.** Evaluation of the 14 independent genome-wide significant findings from Table 2 in the lifestyle treatment arm of the DPP.

| rsid        | Chr | Position* | Nearest gene        | EA | NEA   | Trait                   | EAF†  | Metformin only model                               |      |         | Lifestyle only model                               |      |         |
|-------------|-----|-----------|---------------------|----|-------|-------------------------|-------|----------------------------------------------------|------|---------|----------------------------------------------------|------|---------|
|             |     |           |                     |    |       |                         |       | Beta                                               | SE   | p       | Beta                                               | SE   | p       |
| rs144322333 | 18  | 705550    | <i>ENOSF1</i>       | C  | CTGTT | HbA1c, %                | 0.013 | 0.39                                               | 0.06 | 2.9E-12 | 0.04                                               | 0.06 | 5.3E-01 |
| rs145591055 | 5   | 38849463  | <i>OSMR</i>         | G  | A     | Weight, kg              | 0.014 | -7.55                                              | 1.19 | 3.2E-10 | 1.08                                               | 1.31 | 4.1E-01 |
| rs13401282  | 2   | 207810690 | <i>CPO</i>          | A  | T     | ISI, ln                 | 0.029 | 0.44                                               | 0.08 | 1.7E-08 | 0.26                                               | 0.09 | 4.1E-03 |
| rs186681623 | 13  | 81546608  | <i>LINC00377</i>    | C  | T     | Weight, kg              | 0.068 | -2.66                                              | 0.47 | 2.0E-08 | 0.79                                               | 0.61 | 2.0E-01 |
| rs17083791  | 5   | 93863813  | <i>KIAA0825</i>     | G  | A     | Weight, kg              | 0.149 | -1.85                                              | 0.33 | 3.3E-08 | 0.03                                               | 0.47 | 9.5E-01 |
| rs9931871   | 16  | 19928315  | <i>GPRC5B</i>       | G  | A     | Fasting glucose, mmol/L | 0.011 | 0.68                                               | 0.12 | 3.5E-08 | -0.07                                              | 0.12 | 5.4E-01 |
| rs549305231 | 6   | 19497504  | <i>LOC101928519</i> | A  | G     | HbA1c, %                | 0.012 | 0.35                                               | 0.06 | 3.9E-08 | -0.12                                              | 0.11 | 2.8E-01 |
| rs73944532  | 2   | 104691634 | <i>LOC100287010</i> | A  | G     | Fasting insulin, ln     | 0.020 | -0.47                                              | 0.08 | 4.1E-08 | -0.15                                              | 0.10 | 1.3E-01 |
| rsid        | Chr | Position* | Nearest gene        | EA | NEA   | Trait                   | EAF†  | Gene × Treatment model‡<br>(metformin and placebo) |      |         | Gene × Treatment model‡<br>(lifestyle and placebo) |      |         |
|             |     |           |                     |    |       |                         |       | Beta                                               | SE   | p       | Beta                                               | SE   | p       |
| rs6838493   | 4   | 185879789 | <i>LINC01093</i>    | A  | T     | HbA1c, %                | 0.011 | -0.66                                              | 0.11 | 1.6E-09 | -0.54                                              | 0.12 | 5.9E-06 |
| rs148219263 | 18  | 58808522  | <i>CDH20</i>        | C  | T     | Weight, kg              | 0.012 | -6.92                                              | 1.22 | 1.9E-08 | 6.31                                               | 1.96 | 1.3E-03 |
| rs75147163  | 14  | 57626769  | <i>EXOC5</i>        | A  | G     | Fasting glucose, mmol/L | 0.022 | -0.73                                              | 0.13 | 1.4E-08 | -0.75                                              | 0.12 | 1.1E-09 |
| rs78075715  | 4   | 6613716   | <i>MAN2B2</i>       | C  | T     | HbA1c, %                | 0.013 | -0.51                                              | 0.09 | 1.4E-08 | -0.40                                              | 0.09 | 7.9E-06 |
| rs12314996  | 12  | 24567467  | <i>SOX5</i>         | A  | G     | HbA1c, %                | 0.016 | -0.47                                              | 0.08 | 3.9E-08 | -0.35                                              | 0.10 | 2.8E-04 |
| rs143203347 | 7   | 107384199 | <i>CBLL1</i>        | C  | G     | Fasting glucose, mmol/L | 0.015 | -0.92                                              | 0.17 | 4.1E-08 | -0.78                                              | 0.19 | 5.0E-05 |

EA=Effect allele; NEA=Non-effect allele; EAF=effect allele frequency. ISI=insulin sensitivity index. \*GRCh37 assembly. †This is the effect allele frequency taken from “All” participants in Table 2. ‡Beta estimates and standard errors (SE) are reported for the interaction term rather than the main effect of metformin or lifestyle.

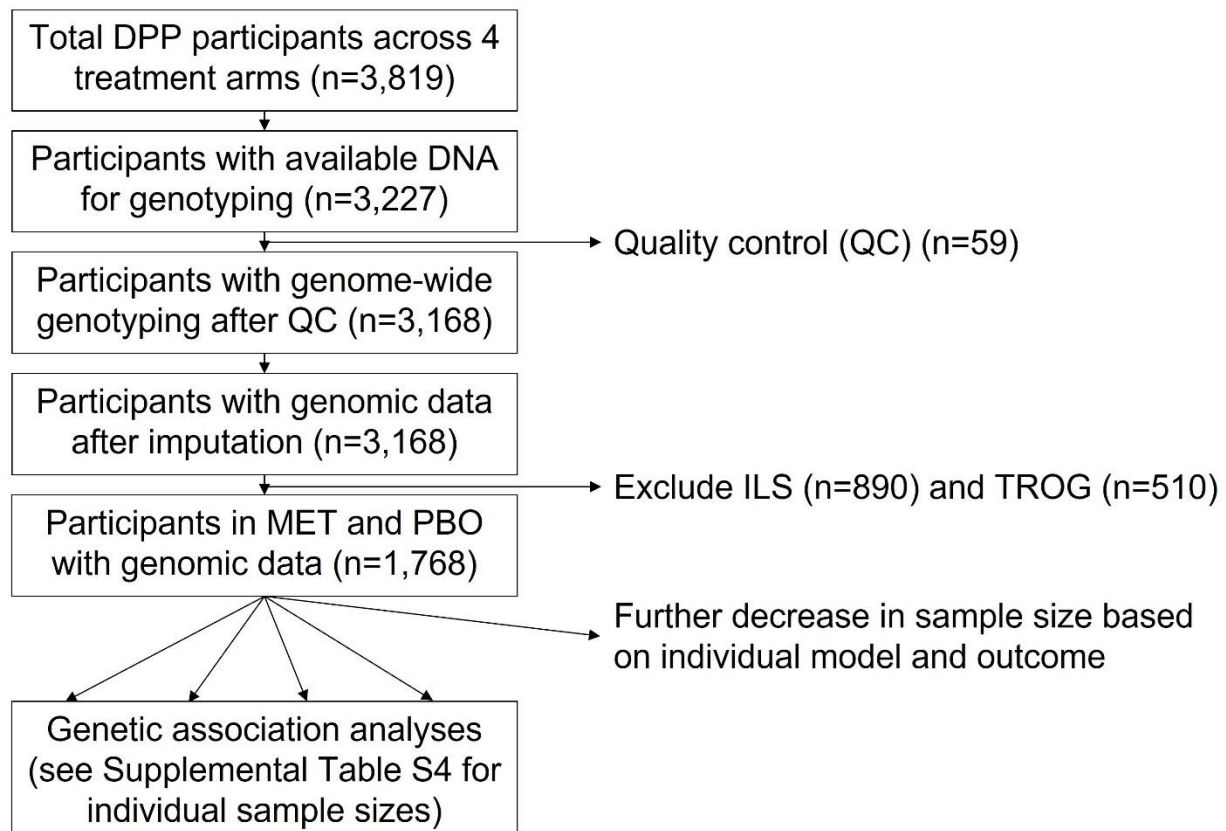

**Supplemental Figure S1.** Flowchart illustrating the sample size reduction in the DPP leading up to genetic association analyses. MET=metformin; ILS=intensive lifestyle modification; PBO=placebo; TROG=troglitazone.

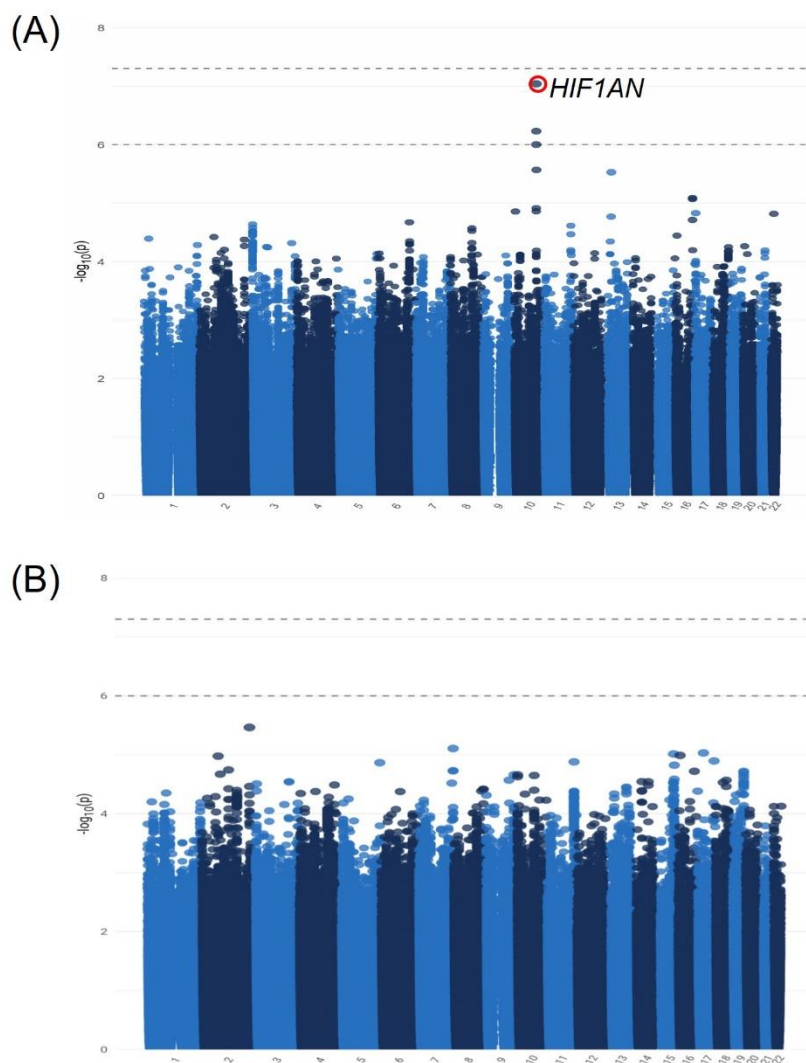

**Supplemental Figure S2.** Manhattan plot of genome-wide results from single marker association with diabetes incidence (A) using an additive genetic model in 876 individuals in the metformin arm only and (B) testing a gene  $\times$  treatment interaction in the placebo and metformin arms in 1,763 individuals. For each panel, the two dotted lines indicate the suggestive significance ( $p < 1 \times 10^{-6}$ ) and genome-wide significance ( $p < 5 \times 10^{-8}$ ). Top loci are circled in red with the closest gene labeled.



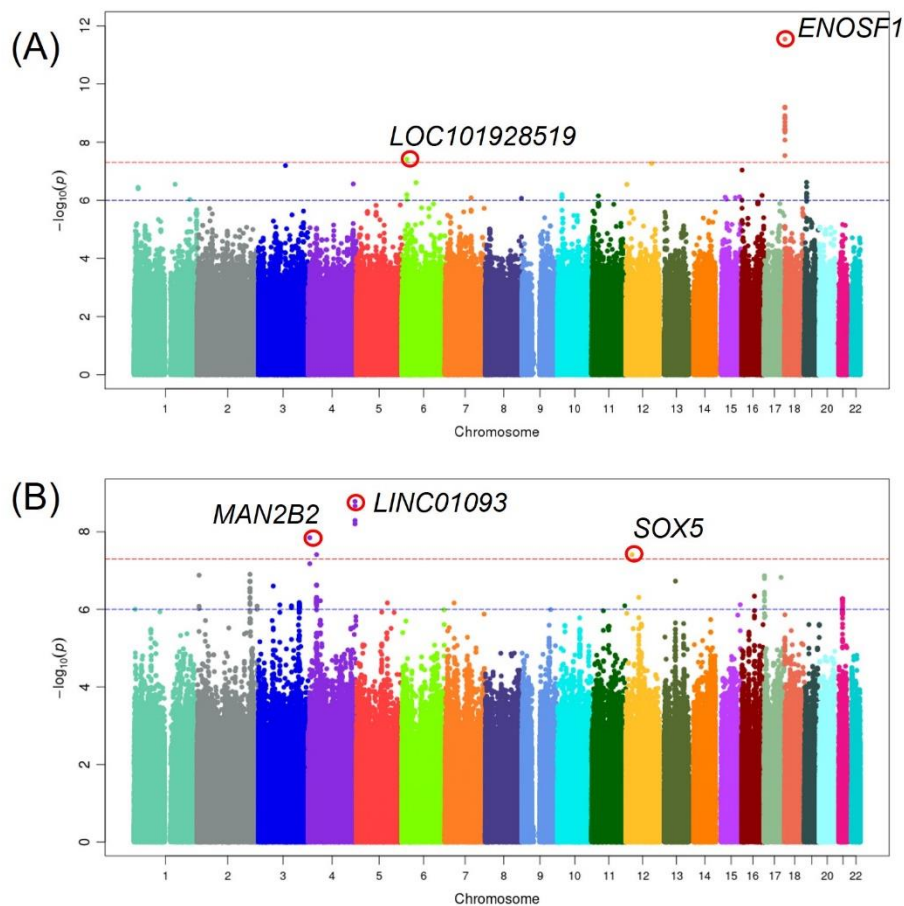

**Supplemental Figure S3.** Manhattan plots of genome-wide results from single marker association with one-year change in HbA1c (A) using an additive genetic model in 818 individuals in the metformin arm only and (B) testing a gene  $\times$  treatment interaction in the placebo and metformin arms in 1,621 individuals. The blue line indicates suggestive significance ( $p < 1 \times 10^{-6}$ ) and the red line indicates genome-wide significance ( $p < 5 \times 10^{-8}$ ). Top loci are circled in red with the closest gene labeled.

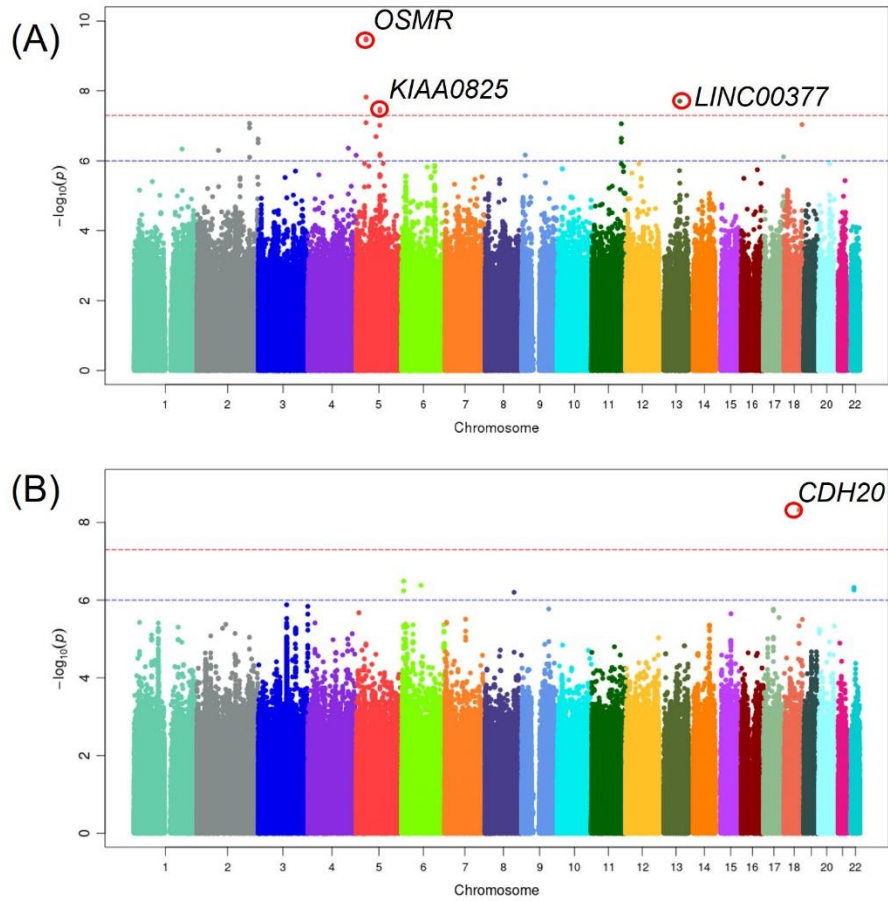

**Supplemental Figure S4.** Manhattan plots of genome-wide results from single marker association with one-year change in weight (A) using an additive genetic model in 829 individuals in the metformin arm only and (B) testing a gene  $\times$  drug interaction in the placebo and metformin arms in 1,673 individuals. The blue line indicates suggestive significance ( $p < 1 \times 10^{-6}$ ) and the red line indicates genome-wide significance ( $p < 5 \times 10^{-8}$ ). Top loci are circled in red with the closest gene labeled.

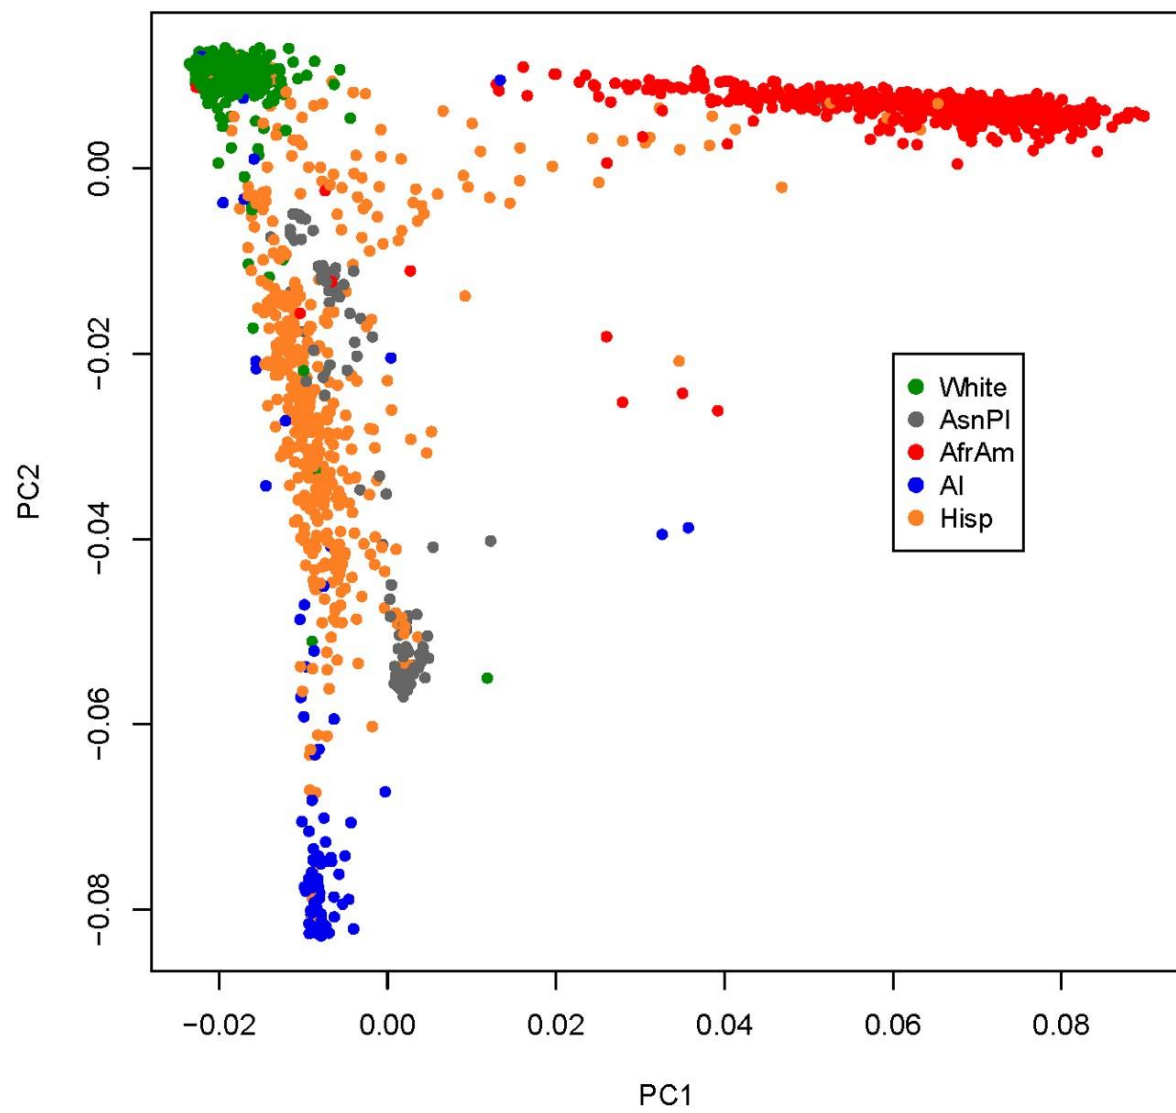

**Supplemental Figure S5.** Self-reported race/ethnicity (colored circles) displayed on a background plot of the first two genetic ancestry principal components.

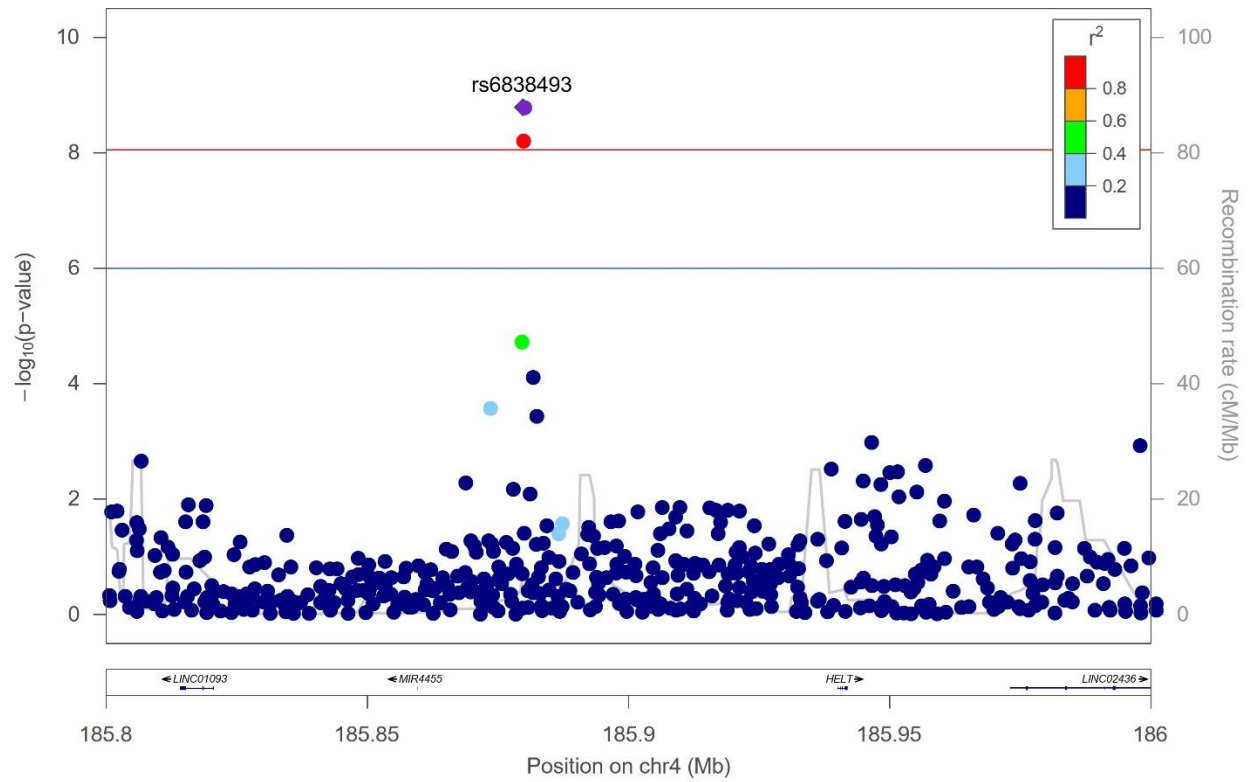

**Supplemental Figure S6.** Regional association plot of rs6838493 for one-year change in HbA1c. The red line indicates the experiment-wide significance threshold of  $p < 9 \times 10^{-9}$  and the blue line indicates a suggestive significance threshold of  $p < 1 \times 10^{-6}$ .

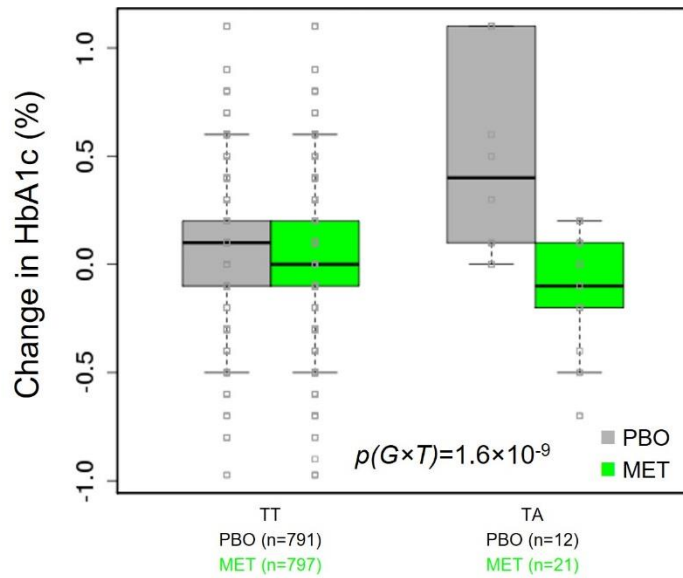

**Supplemental Figure S7.** Comparison of the influence of rs6838493 genotype on the mean change in HbA1c (one-year minus baseline) in the metformin (MET, n=818) and placebo (PBO, n=803) arms. The interaction  $p$ -value is reported. For the purposes of generating the box plots, fractional alleles were converted to “hard calls” by rounding to the nearest integer.

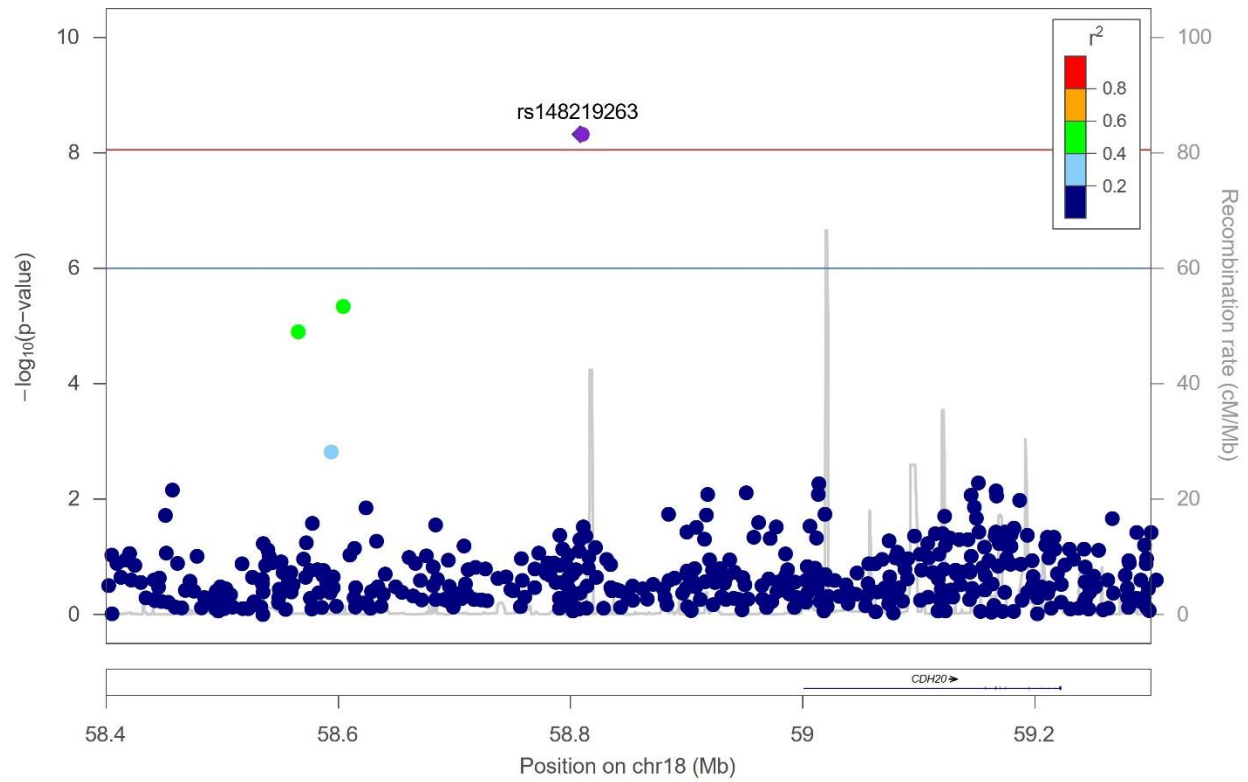

**Supplemental Figure S8.** Regional association plot of rs148219263 for one-year change in weight. The red line indicates the experiment-wide significance threshold of  $p < 9 \times 10^{-9}$  and the blue line indicates a suggestive significance threshold of  $p < 1 \times 10^{-6}$ .

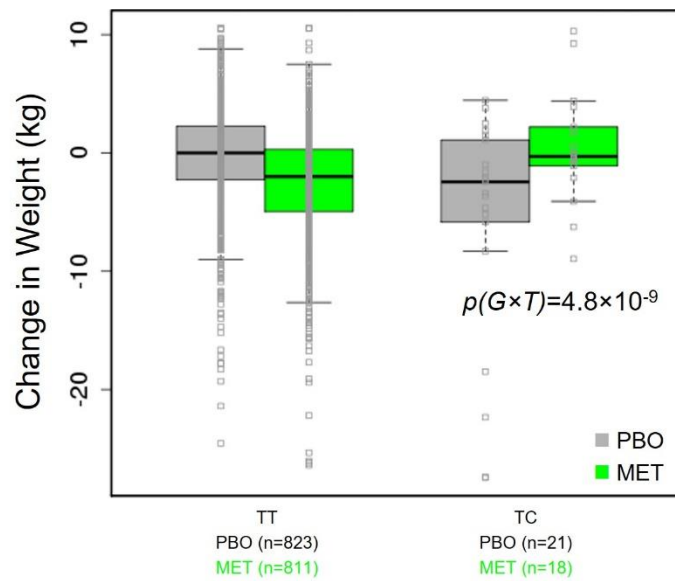

**Supplemental Figure S9.** Comparison of the influence of rs148219263 genotype on the mean change in weight (one-year minus baseline) in the metformin (MET, n=829) and placebo (PBO, n=844) arms. The interaction  $p$ -value is reported. For the purposes of generating the box plots, fractional alleles were converted to “hard calls” by rounding to the nearest integer.

## References

1. Zhou K, Yee SW, Seiser EL, et al. Variation in the glucose transporter gene SLC2A2 is associated with glycemic response to metformin. *Nat Genet* 2016;48:1055-1059
2. Vujkovic M, Keaton JM, Lynch JA, et al. Discovery of 318 new risk loci for type 2 diabetes and related vascular outcomes among 1.4 million participants in a multi-ancestry meta-analysis. *Nat Genet* 2020;52:680-691
